# Supplementary material for: Lessons from Local Community Perspectives on Ecosystem Services and Disservices of Invasive Alien Plant Species in Speke Gulf, Lake Victoria, Tanzania
Source: Research Square preprint supplement (doi:10.21203/rs.3.rs-7867347/v1), 2025-12-22
Supplement: Supplementary file 1 [file 1056d738590486e68e15208c.docx]

**
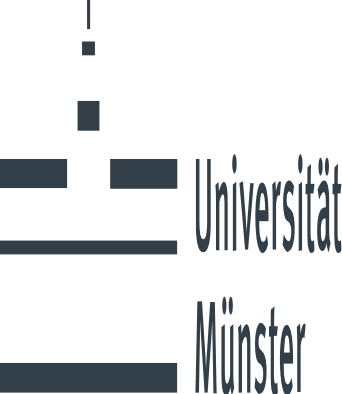

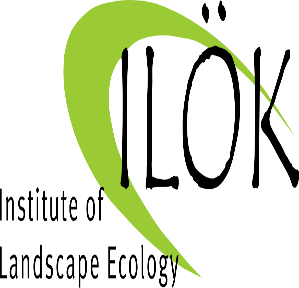
**

**Lessons from Local Community Perspectives on Ecosystem Services and Disservices of Invasive Alien Plant Species in Speke Gulf, Lake Victoria, Tanzania**

**Data collector**

**Name:**

**Latitude………. Longitude ……… Attitude…………**

**Date:**

**A: Demographic Distribution of the Study Population**

**1. Village Name:..**

**2. Gender**:

- Female
- Male

**3. Age (Years)…….**

**4. Ethnicity (Tribe)--------------------**

**5 Education Level**

- No formal education
- Primary education
- Secondary education
- College/University

**6. Were you born in this village ?**

- Yes
- No

**If no explain where…………**

**7. How long have you been living here?**

- 0-10 years
- 10-20 years
- 20-30years
- 30-40 years
- 40-50years
- 50 and above years

**8. What is your economic activity**

- Farmer
- Pastoralist
- Agro-pastoralist
- Entrepreneur
- **Other**

**Explain…….**

**9: How much do you earn per month?**

- 50,000-100,000
- 200,000-500,000
- 600,000-1,000,000
- 2,000,000-10,000000
- 10,000,000 and above

**10. How many people live in this household?**

**B: Ecosystem services and disservices from invasive alien plant species (IAPs).**

**1. (a) In which season of the year is this plant abundant?**

| **IAS Name** | **Dry Season** | **Wet season** | **Throughout the year** | **I don’t know** |
| --- | --- | --- | --- | --- |
| *E. crassipes* |  |  |  |  |
| *C.odorata* |  |  |  |  |
| *L.camara* |  |  |  |  |
| *I.hildebrandtii* |  |  |  |  |

**1. (a) Which one of the following best describes its effects on your livelihood?**

| **IAS Name** | **Very harmful** | **Harmful** | **Undecided** | **Beneficial** | **Very Beneficial** |
| --- | --- | --- | --- | --- | --- |
| *E. crassipes* |  |  |  |  |  |
| *C.odorata* |  |  |  |  |  |
| *A. mexicana* |  |  |  |  |  |
| *L.camara* |  |  |  |  |  |
| *I.hildebrandtii* |  |  |  |  |  |

**1 (b) What is the extent of the impact caused by this species?**

| **IAS Names** | **Very High** | **High** |  | **Moderate** | **Low** | **Very Low** |
| --- | --- | --- | --- | --- | --- | --- |
| *E. crassipes* |  |  |  |  |  |  |
| *C.odorata* |  |  |  |  |  |  |
| *A. mexicana* |  |  |  |  |  |  |
| *L.camara* |  |  |  |  |  |  |
| *I.hildebrandtii* |  |  |  |  |  |  |

**2 (a) Are there any negative effects of IAPS?**

- Yes
- No

**2 (b) In your opinion, which plants have the following negative impacts in your area?**

*E. crassipes*

*C.odorata*

*A. mexicana*

*L.camara*

*I.hildebrandtii*

**Interference with harvesting**

*E. crassipes* Yes, No *C. odorata* Yes No *A. mexicana* Yes No

*L.camara* Yes, No *I. hildebrandtii* Yes No

**Resource competition and costly control method**

*E. crassipes* Yes, No *C. odorata* Yes No *A. mexicana* Yes No

*L.camara* Yes, No *I. hildebrandtii* Yes No

**Endangers indigenous tree species**

*E. crassipes* Yes, No *C. odorata* Yes No *A.mexicana* Yes No

*L.camara* Yes, No *I. hildebrandtii* Yes No

**Poisoning of Livestock**

*E. crassipes* Yes, No *C. odorata* Yes No *A. mexicana* Yes No

*L.camara* Yes, No *I. hildebrandtii* Yes No

**Harbors pests**

*E. crassipes* Yes, No *C. odorata* Yes No *A.mexicana* Yes No

*L.camara* Yes, No *I. hildebrandtii* Yes No

**Disrupts succession and Decrease plant diversity or biodiversity**

*E. crassipes* Yes, No *C. odorata* Yes No *A.mexicana* Yes No

*L.camara* Yes, No *I. hildebrandtii* Yes No

**Loss of pasture in grazing areas**

*E. crassipes* Yes, No *C. odorata* Yes No *A. mexicana* Yes No

*L.camara* Yes, No *I. hildebrandtii* Yes No

Poisoning of human beings

*E. crassipes* Yes, No *C. odorata* Yes No *A. mexicana* Yes No

*L.camara* Yes, No *I. hildebrandtii* Yes No

Act as weeds in Farmland

*E. crassipes* Yes, No *C. odorata* Yes No *A.mexicana* Yes No

*L.camara* Yes, No *I. hildebrandtii* Yes No

**3(a) Are there any positive effects of IAPS?**

- **Yes**
- **No**

**2 (b) In your opinion, which plants have the following positive impacts in your area?**

*E. crassipes*

*C.odorata*

*A. mexicana*

*L.camara*

*I.hildebrandtii*

**Has medicinal value**

*E. crassipes* Yes, No *C. odorata* Yes No *A.mexicana* Yes No

*L.camara* Yes, No *I. hildebrandtii* Yes No

**Source of income from fuelwood and other raw materials**

*E. crassipes* Yes, No *C. odorata* Yes No *A.mexicana* Yes No

*L.camara* Yes, No *I. hildebrandtii* Yes No

**Combat desertification**

*E. crassipes* Yes, No *C. odorata* Yes No *A.mexicana* Yes No

*L.camara* Yes, No *I. hildebrandtii* Yes No

**Source of organic matter for soil fertility**

*E. crassipes* Yes, No *C. odorata* Yes No *A.mexicana* Yes No

*L.camara* Yes, No *I. hildebrandtii* Yes No

**It is ornamental and a source of good air**

*E. crassipes* Yes, No *C. odorata* Yes No *A.mexicana* Yes No

*L.camara* Yes, No *I. hildebrandtii* Yes **No**

**Fencing homestead and farms**

*E. crassipes* Yes, No *C. odorata* Yes No *A.mexicana* Yes No

*L.camara* Yes, No *I. hildebrandtii* Yes No

**House construction**

*E. crassipes* Yes, No *C. odorata* Yes No *A.mexicana* Yes No

*L.camara* Yes, No *I. hildebrandtii* Yes No

**Making baskets and Temporary platforms for resting**

*E. crassipes* Yes, No *C. odorata* Yes No *A.mexicana* Yes No

*L.camara* Yes, No *I. hildebrandtii* Yes No

**Source of fodder for livestock**

*E. crassipes* Yes, No *C. odorata* Yes No *A.mexicana* Yes No

*L.camara* Yes, No *I. hildebrandtii* Yes No

**Used as Agricultural pesticides**

*E. crassipes* Yes, No *C. odorata* Yes No *A.mexicana* Yes No

*L.camara* Yes, No *I. hildebrandtii* Yes No

**C: Management and governance systems on invasive alien plant species.**

**1. In which season of the year is this plant abundant?**

| **IAs Name** | **Dry Season** | **Wet season** | **Throughout the year** |  | **I don’t know** |
| --- | --- | --- | --- | --- | --- |
| *E. crassipes* |  |  |  |  |  |
| *C. odorata* |  |  |  |  |  |
| *A. mexicana* |  |  |  |  |  |
| *L.camara* |  |  |  |  |  |
| *I. hildebrandtii* |  |  |  |  |  |

**2. How are you managing invasive Plant species in your community land**

| Methods | *E. crassipes* | *C.odorata* | *A. mexicana* | *L.camara* | *I.hildebrandtii* |
| --- | --- | --- | --- | --- | --- |
| Traditional methods |  |  |  |  |  |
| Manual control |  |  |  |  |  |
| Herbicides/ chemical control |  |  |  |  |  |
| Biological control |  |  |  |  |  |
| Burning |  |  |  |  |  |
| Ploughing |  |  |  |  |  |
| Mowing/ cutting |  |  |  |  |  |
| Integrated method |  |  |  |  |  |
| Grazing |  |  |  |  |  |
| Doing Nothing |  |  |  |  |  |

2(b). Could you estimate the total cost of the management measures for each species? In terms of time

| **IAS Name** | **Very high** | **High** | **Moderate** | **Low** | **Very Low** |
| --- | --- | --- | --- | --- | --- |
| *E. crassipes* |  |  |  |  |  |
| *C.odorata* |  |  |  |  |  |
| *A. mexicana* |  |  |  |  |  |
| *L.camara* |  |  |  |  |  |
| *I.hildebrandtii* |  |  |  |  |  |

**2. (c) Could you estimate the total cost of the management measures for each species? In terms of money**

| **IAS Name** | **Very high** | **High** | **Moderate** | **Low** | **Very Low** |
| --- | --- | --- | --- | --- | --- |
| *E. crassipes* |  |  |  |  |  |
| *C.odorata* |  |  |  |  |  |
| *A. mexicana* |  |  |  |  |  |
| *L.camara* |  |  |  |  |  |
| *I.hildebrandtii* |  |  |  |  |  |

**2. (d) Could you indicate what the result of the management measures has been?**

| **IAPs Name** | Eliminate | Decrease considerably | Decreasing very little | Not decreasing | Expanding | Expanding very quickly |
| --- | --- | --- | --- | --- | --- | --- |
| *E. crassipes* |  |  |  |  |  |  |
| *C.odorata* |  |  |  |  |  |  |
| *A. mexicana* |  |  |  |  |  |  |
| *L.camara* |  |  |  |  |  |  |
| *I.hildebrandtii* |  |  |  |  |  |  |

3. Do you have any bylaws and frameworks on managing IAPs at the village level

- Yes
- No

If yes explain

---------------------------------------------------------------------------------------------

4. What is your opinion on the management and governance of IAPs?

- Very easy
- Easy
- Difficult
- Very difficult

5. With your opinions, is IAS a huge problem in this village?

- Yes, it is a huge problem
- No, not a huge problem

6. Do you have any questions or suggestions?

**NB**

**Criteria for Each Category on the Impact Extent**

- Very High: Severe, widespread, long-term impacts on ecosystems, livelihoods, and biodiversity.
- High: Significant impacts, but with potential for partial recovery or limited geographic scope.
- Moderate: Noticeable but localized impacts that are manageable.
- Low: Minimal or negligible impacts on the community or ecosystem.

**Measurable Indicators**

- Ecological: Loss of biodiversity, disruption of ecosystem functions, or the spread rate of the species.
- Economic: Direct financial losses, increased control costs, or reduced productivity.
- Social: Health impacts, cultural losses, or reduced access to ecosystem services.
